Cite this article as: Xu Z-J, Zhuo Z-G, Song T-N, Alai G-H, Shen X, Yao P *et al.* Corrigendum to 'Role of nodal skip metastasis in patients with mid-thoracic oesophageal squamous cell carcinoma: a propensity score matching study'. *Eur J Cardiothorac Surg* 2021;59:930.

## Corrigendum to 'Role of nodal skip metastasis in patients with mid-thoracic oesophageal squamous cell carcinoma: a propensity score matching study' [*Eur J Cardiothorac Surg* 2021;59:799–806]

Zhi-Jie Xu, Ze-Guo Zhuo, Tie-Niu Song, Gu-Ha Alai, Xu Shen, Peng- Yao and Yi-Dan Lin  \*

Department of Thoracic Surgery, West China Hospital, Sichuan University, Chengdu, China

\* Corresponding author. Department of Thoracic Surgery, West China Hospital, Sichuan University, No. 37 Guoxue Alley, Chengdu 610041, China. Tel: +86-18980602136; fax: +86-02885422498; e-mail: linyidan.academy@foxmail.com (Y.-D. Lin).

The authors bring to the attention of the readers that there is an error in Fig. 1. The correct figure is reproduced below and has been corrected in the full article online.

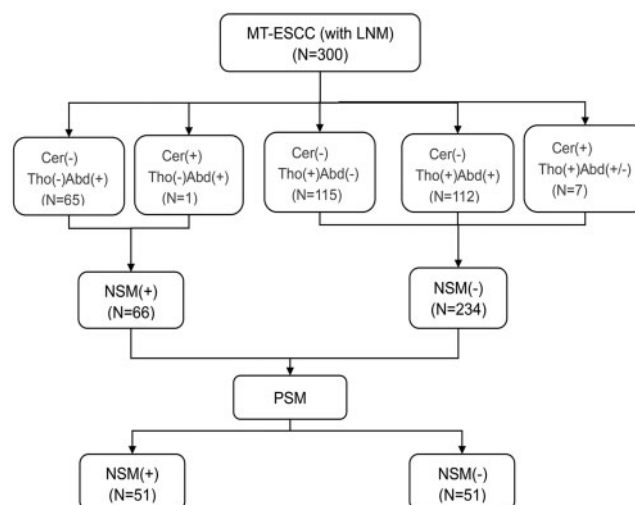

**Figure 1:** Overview of patient selection and grouping. Abd: abdominal; Cer: cervical; LNM: lymph node metastasis; MT-OSCC: mid-thoracic oesophageal squamous cell cancer; NSM: nodal skip metastasis; PSM: propensity score matching; Tho: thoracic.
